## 1 [Lay summary](#)

2 Damage-inducing reactive oxygen species (ROS) are a by-product of oxygen-based energy  
3 production, and are only quenched by energetically expensive antioxidants. Male sexual coloration  
4 requires investment of energy and resources, which may compromise other functions like  
5 antioxidant production or spermatogenesis. Here we tested whether the energy stores of colourful  
6 male lizards reflected their investment in antioxidants, reduced ROS, and affected sperm  
7 performance. We found that drab males in better condition had more antioxidants, which in turn  
8 decreased ROS their effects on sperm. Colourful males had lower levels of antioxidants and their  
9 sperm performed poorly at higher ROS levels. These results suggest a trade-off between color  
10 maintenance and sperm performance.

## 11 [Title](#)

12 Condition-dependent SOD activity attenuates morph-specific superoxide effects on sperm  
13 performance

14 Christopher R. Friesen<sup>1,2†</sup>, Simon P. de Graaf<sup>2</sup>, Mats Olsson<sup>1,2,3</sup>

15 1. University of Wollongong, School of Earth, Atmospheric and Life Sciences, Wollongong, NSW  
16 2522, Australia

17

18 2. The University of Sydney, Faculty of Science, School of Life and Environmental Sciences, NSW  
19 2006, Australia

20

21 3. University of Gothenburg, Department of Biological & Environmental Sciences, Gothenburg,  
22 Sweden

23 †Corresponding author: [cfriesen@uow.edu.au](mailto:cfriesen@uow.edu.au)

24

## 25 [Running headline](#)

26 Condition-dependent sperm performance

## 27 [Abstract](#)

28 Sperm competition theory predicts a negative correlation between somatic investment in traits that  
29 aid in pre- and postcopulatory sexual selection. Sperm performance is critical for postcopulatory  
30 success but is susceptible to damage by free radicals such as superoxide radicals generated during

31 mitochondrial respiration (mtSOx). Males can ameliorate damage to spermatozoa by investing in the  
32 production of antioxidants, such as superoxide dismutase (SOD), which may be act as a mechanistic  
33 link for pre and postcopulatory trade-offs. Some male Australian, color-polymorphic painted dragon  
34 lizards (*Ctenophorus pictus*) possess a yellow throat patch (bib) that females prefer over non-bibbed  
35 males and are also more likely to win male-male contests indicating that males with bibs are better  
36 at monopolizing females. We tested whether the sperm performance in non-bibbed males was  
37 superior to that of bibbed males as predicted by sperm competition theory. We show that blood cell  
38 mtSOx levels are negatively correlated with SOD activity in the plasma in all males early in the  
39 breeding season but SOD was lower in bibbed males. Non-bibbed males maintain a positive  
40 correlation between body condition and SOD activity over time while bibbed males do not. Overall  
41 sperm performance was not different between the bib-morphs, however, mtSOx levels negatively  
42 affect sperm performance in bibbed males, but not of non-bibbed males. Together these data  
43 suggest physiological links between body condition, SOD activity and sperm performance are specific  
44 to the expression of a yellow gular patch, which may be related to intrinsic differences in  
45 metabolism of bibbed versus non-bibbed males.

#### 46 [Keywords](#)

47 Sperm performance, oxidative stress, polymorphism, body condition, condition dependence, lizard  
48

## 49 Introduction

50 Theoretical models of ejaculate investment under sperm competition predict an allocation  
51 trade-off between pre- and postcopulatory traits generating a negative correlation between these  
52 two types of traits (Parker, 1970; Parker et al., 2013; Parker and Pizzari, 2010; Tazzyman et al., 2009).  
53 Among individuals of the same species, nutritional resources and energy allocation—quality or  
54 condition—is especially likely to mediate pre- and postcopulatory trade-offs (Tuni et al., 2018).  
55 Indeed, empirical results indicate investment in precopulatory traits is often negatively correlated  
56 with testes size, predominantly in species where males are able to monopolise females (Dines et al.,  
57 2015; Dunn et al., 2015; Fitzpatrick et al., 2012; Kahrl et al., 2016; Lupold et al., 2014; Simmons and  
58 Emlen, 2006). However, in addition to size, other testicular adaptations may also be important for  
59 postcopulatory sexual selection (Ramm and Schärer, 2014). A critical function of the testis is to  
60 protect sperm from oxidative damage during spermatogenesis and subsequent storage (Aitken and  
61 Roman, 2008; Ko et al., 2014; Ramm and Schärer, 2014). Oxidative damage of functionally critical  
62 macromolecules (membrane lipids, cellular proteins, and DNA) by reactive oxygen species (ROS)  
63 adversely affects whole organism physiological performance, health and lifespan (Finkel and  
64 Holbrook, 2000). ROS are free radicals naturally, and principally produced in mitochondria during  
65 oxidation-reduction reactions occurring in the electron transport chain (ETC) during oxidative-  
66 phosphorylation generating ATP and therefore tightly linked to energy production (Murphy, 2009;  
67 Turrens, 2003). Spermatozoa are particularly vulnerable to oxidative damage because their  
68 membranes are composed of a high proportion of easily oxidized polyunsaturated fatty acids  
69 (Sanocka and Kurpisz, 2004). Therefore, selection on energetically expensive mechanisms to reduce  
70 oxidative damage is important both for life-history evolution and sexually selected traits, potentially  
71 generating condition dependent soma-germline trade-off (Dowling and Simmons, 2009; Metcalfe  
72 and Alonso-Alvarez, 2010; Monaghan et al., 2009; von Schantz et al., 1999).

73           As they are terminally differentiated and transcriptionally inactive with limited antioxidative  
74 defenses, spermatozoa are unable to repair molecular damage (Tremellen, 2008). Consequently,  
75 ROS production and damage are self-perpetuating in spermatozoa leading to reduced sperm  
76 function, velocity and percent of progressively motile sperm, which are strongly associated with  
77 male infertility in humans (Aitken et al., 1989; Aitken and Graves, 2002; Koppers et al., 2008;  
78 Tremellen, 2008). Intuitively, sperm performance is conjoined with male reproductive success so  
79 oxidative stress at the organismal level should have important implications in postcopulatory sexual  
80 selection (Firman and Simmons, 2010; Fitzpatrick and Lupold, 2014; Møller, 1988; Simmons and  
81 Fitzpatrick, 2012). Sperm competition puts males in a double bind. The production of more sperm  
82 requires increased metabolic activity in the testes (Gomendio et al., 2011; Parapanov et al., 2008;  
83 Tourmente et al., 2011), which may then be accompanied by a concomitant increase in ROS  
84 production and adaptations to ameliorate the associated costs (delBarco-Trillo and Roldan, 2014;  
85 Ribou and Reinhardt, 2012). Even in species with relatively short-term sperm storage and with  
86 limited opportunity for sperm competition, such as humans (Simmons et al., 2004; van der Horst and  
87 Maree, 2014), oxidative damage strongly influences sperm performance and male reproductive  
88 success (Aitken et al., 2014). Allocating resources for protecting sperm from oxidative damage to  
89 maintain high sperm performance is even more vital in the context of sperm competition (Dowling  
90 and Simmons, 2009).

91           Protection from and repairing damage caused by ROS during spermatogenesis is potentially  
92 costly and may be condition dependent (Costantini, 2008, 2014; Monaghan and Costantini, 2014).  
93 There is increasing evidence of the conditional dependence of sperm production (e.g. numbers and  
94 morphology Dávila and Aron, 2017; Kahrl and Cox, 2015) and sperm velocity, motility and  
95 fertilization success (Mitre et al., 2004; Rakitin et al., 1999). Male condition dependence of oxidative  
96 status affects sperm quality, and there is increasing evidence that male coloration often reflects  
97 antioxidant status (Helfenstein et al., 2010; reviewed in, Svensson and Wong, 2011; von Schantz et  
98 al., 1999) and studies indicate coloration and sperm quality can be correlated (Locatello et al., 2006;

99 Peters et al., 2004; Pitcher et al., 2007; Rowe et al., 2010). For example, Helfenstein et al. (2010)  
100 showed that male great tits (*Parus major*) with paler carotenoid-based breast plumage subjected to  
101 experimentally elevated workloads had higher lipid peroxidation (an indicator of oxidative damage)  
102 as well as reduced sperm motility and ‘swimming ability’; these effects were ameliorated with  
103 supplementation of dietary carotenoid antioxidants. Age-related declines in the innate antioxidant  
104 capacity of red junglefowl (*Gallus gallus*), was associated with an increase in oxidative damage, and a  
105 decline in sperm quality (Noguera et al., 2012). Decreased endogenous antioxidant expression  
106 translates to lower sperm competitiveness as Garratt et al. (2013) show that mice deficient in the  
107 endogenous antioxidant superoxide dismutase (SOD) had no fertilization success in sperm  
108 competition trials. Thus, the role of oxidative stress in sperm performance and/or fertilization  
109 success *in vivo*, preferably in wild populations, merits attention (Dowling and Simmons, 2009). Such  
110 analyses would be particularly interesting in intraspecific studies on males with divergent  
111 reproductive strategies characterized by trade-offs between pre- and postcopulatory sexually  
112 selected traits (Lupold et al., 2014).

113           Color-polymorphic species can be a useful tool in determining the selective forces that drive  
114 sexually selected trait expression in wild populations. Heritable color morphs often have divergent  
115 behaviours and physiology, with associated differences in reproductive tactics in animals with an  
116 otherwise common genetic background (Healey et al., 2007; Huxley, 1955; Olsson et al., 2007b;  
117 Olsson et al., 2009a; Pryke et al., 2007; Pryke and Griffith, 2006; Sinervo and Lively, 1996; reviewed  
118 in Wellenreuther et al., 2014).

119           Here we assess the relationship between an important mitochondrial ROS—antioxidant pair,  
120 a measure of resources (body condition: BCI) and sperm performance in a wild color-polymorphic  
121 lizard, the Australian painted dragon (*Ctenophorus pictus*). Primary ROS production in mitochondria  
122 begins with the single reduction of molecular oxygen ( $O_2$ ) to form superoxide ( $O^{\bullet-}$ ), which is the rate  
123 limiting step in the subsequent damaging cascade of ROS production (Andreyev et al., 2015; Turrens,

124 2003). On its own, superoxide is a relatively weak oxidizer of macromolecules; however, superoxide  
125 reduces iron ( $\text{Fe}^{2+}$ ) which may then catalyse the disproportionation of hydrogen peroxide ( $\text{H}_2\text{O}_2$ ) to  
126 produce the hydroxyl radical ( $\cdot\text{OH}$ ), which is the strongest oxidizing agent in biological systems  
127 (Fridovich, 1995; Turrens, 2003) . So we will focus on superoxide and its elimination by the action of  
128 an endogenous enzyme, superoxide dismutase (SOD), which, at sufficiently high concentrations,  
129 eradicates  $\text{O}_2^{\cdot-}$  at the rate of diffusion (MnSOD in the mitochondrial matrix, and Cu/ZnSOD in the  
130 intermembrane space; Fridovich, 1995; Turrens, 2003). Thus, although there are other important  
131 endogenous antioxidants (e.g., catalase and various isoforms of glutathione peroxidase), the balance  
132 between superoxide and SOD is a significant mediator of incipient oxidative stress during energy  
133 (ATP) production.

134         Oxidative stress and sexual selection biology of painted dragons have been the subject of  
135 extensive investigations. For example, aggressive morphs have higher testosterone (T) superoxide  
136 levels when their mitochondria are maximally active than in less aggressive with lower T (Olsson et  
137 al., 2007a; Olsson et al., 2009c). Experimental lowering of superoxide levels using exogenous doses  
138 of SOD mimetic (EUK 134) reduces color fading over the breeding season (Olsson et al., 2012b).  
139 Although color is in part carotenoid-based, a potential exogenous antioxidant, dietary manipulation  
140 of carotenoids does not mediate a relationship between superoxide and bright coloration (Olsson et  
141 al., 2008). Males in better body condition (residuals of mass-length regression) have enhanced  
142 morph-specific color maintenance despite higher net ROS levels (Friesen et al., 2017b) indicating  
143 that investment in endogenous antioxidants may be condition-dependent. Together these studies  
144 suggest that there are evolutionarily important links between body condition, SOD and superoxide  
145 levels, and sexual coloration in painted dragons.

146         In this paper we exploit natural variation in a color trait, the presence or absence of a yellow  
147 gular patch (henceforth, bib **Fig 1**), which is an important, but costly, sexually selected color-trait in  
148 painted dragons. Bibbed male painted dragons have greater declines in body condition in the wild

149 than non-bibbed males (Healey and Olsson, 2009a; Olsson et al., 2009a), greater telomere attrition  
150 (Rollings et al., 2017) and higher resting metabolic rate through the breeding season than non-  
151 bibbed males (Friesen et al., 2017a). These costs of bearing a bib, must come with potential fitness  
152 benefits, to explain the trait's persistence in the population. Indeed, bibbed males are more  
153 attractive to females in staged preference trials and win male-male competition trials when pitted  
154 against non-bibbed rivals indicating there is a precopulatory mating advantage for bibbed males  
155 (McDiarmid et al., 2017). Bibbed males are less likely than non-bibbed males to lose paternity to  
156 neighbouring males in the wild (Healey and Olsson, 2009a; Olsson et al., 2009a), which may be due  
157 to mate monopolization. McDiarmid et al. (2017), hypothesized that this precopulatory advantage of  
158 bibbed males is an evolutionarily (reduced selection for sperm performance) sperm motility and  
159 velocity did not differ between bibbed and non-bibbed males. However, McDiarmid et al. (2017) did  
160 not analyse the effects of body condition and superoxide and SOD were not measured. We make  
161 three straightforward predictions: 1) SOD and superoxide level should be negatively correlated, 2)  
162 sperm performance and superoxide levels should be negatively correlated, and 3) if SOD is indeed  
163 costly, body condition should be positively correlated with SOD levels. If there is a resource  
164 allocation trade-off, then bibbed males should have lower sperm performance after accounting for  
165 SOD and body condition than non-bibbed males.

## 166 [Methods](#)

### 167 [Animal collection/housing and mating trials](#)

168 The Australian painted dragon (*Ctenophorus pictus*, Peters 1866) is a small (adult: mass 8 – 18g;  
169 snout-to-vent length [SVL] 55-75mm) agamid lizard native to arid parts of central New South Wales  
170 to Western Australia (Cogger, 2014). All research was conducted with the approval of the University  
171 of Sydney Animal Ethics Committee Project Number: 2013-2016/6050 and were collected under  
172 NSW National Parks and Wildlife Service Scientific licence number SL100352. Lizards were caught at

173 Yathong Nature Reserve, New South Wales (145°35'; 32°35') and were brought back to holding  
174 facilities at the University of Sydney (14, October: N = 40 females; N = 56 males; 20 bibbed and 36  
175 non-bibbed males). The animals were sampled at random at the study site and, hence,  
176 approximately represent natural frequencies in the wild at the time. Males were kept individually in  
177 tanks (60 × 60 × 50cm) on a 12:12h (light:dark) light regime with a basking light for  
178 thermoregulation. They were watered daily, and fed crickets and mealworms to satiation every  
179 second day.

180         After a three-week acclimation period, we conducted mating trials on five different days in  
181 the period between 6-Nov.-4 Dec (5-8 matings per day). This period corresponds with the middle  
182 third of the breeding season in the wild (late September-late December). We obtained 5-8 matings  
183 on any given day which allowed for timely processing of both sperm and blood samples with minimal  
184 temporal separation. Each male was observed continuously after the introduction of a receptive  
185 female to his own cage. Males usually mated within 10 minutes of the female's introduction, and  
186 trials were terminated if mating did not occur after 1 hour. Only those males that mated were  
187 included in this study (N = 31 of 56 males mated; 12 bibbed and 19 non-bibbed males). Although not  
188 all males mated, the ratio of bibbed/non-bibbed males was the same as those brought back to the  
189 lab ( $X^2_{df=1} = 0.077$ ,  $P = 0.781$ ). Females were used only once during the receptive phase of their 3 week  
190 reproductive cycle (Olsson et al., 2009b).

191         Subsequent to copulation, semen was collected from the female's cloaca by pulling the  
192 ejaculate into a 1mL syringe (Olsson, 2001) preloaded with 100µL Hams F-10 medium (Cat # 99175,  
193 Irvine Scientific, Santa Ana, CA, USA; 21 mM HEPES buffer, 4 mM sodium bicarbonate, 1 mM calcium  
194 lactate, 0.5 mM magnesium sulfate, 5 mg mL<sup>-1</sup> (0.5%) human albumin; e.g., (Friesen et al., 2013;  
195 Friesen et al., 2014; Mattson et al., 2007; McDiarmid et al., 2017). Sperm samples were kept at  
196 35±1°C in an incubator until they were analysed using computer-assisted sperm analysis (CASA, see



197 below)  $\leq$  30 minutes after collection; 35°C is the preferred body temperature of this species (Melville  
198 and Schulte II, 2001). A pilot study (N = 6) showed no significant decline in sperm motility or velocity  
199 60 minutes, and was verified in the full data set presented in this paper (see results below). We  
200 collected a blood sample in a capillary tube from a vessel in the corner of the mouth, the *vena*  
201 *angularis*, after it was nimbly punctured with an 18ga syringe needle. Each blood sample was taken  
202 within 5 min of semen collection for mitochondria superoxide and superoxide dismutase analysis  
203 (below). Body mass and snout-to-vent length (SVL) were recorded the same day as mating trials.

#### 204 Sperm performance—Computer aided sperm analysis (CASA)

205 The ejaculate was diluted to  $1 \times 10^6$ /mL with Hams F-10 medium and slowly pipetted (10.0 $\mu$ L) into the  
206 chamber of a pre-warmed sperm analysis slide (Hamilton-Thorne 2X-CEL<sup>®</sup>; Beverly, MA, USA;  
207 warmed to 35°C on a slide warmer). Sperm were examined using CASA at a frame rate set to 60hz  
208 (Hamilton-Thorne, IVOS-II; Beverly, MA, USA). Sperm motility was determined for a minimum of 300  
209 sperm per individual. In pilot work, we found it impossible to eliminate all particulates from the  
210 ejaculate without negatively affecting sperm motility with excessive washing. Therefore, we  
211 modified CASA factory settings to classify sperm as motile only if its velocity was  $\geq 5 \mu\text{m/s}$  with no  
212 constraints on path straightness. In addition, we visually inspected each sperm track to verify that  
213 only sperm were included in the analysis and to confirm accurate tracking of multiple sperm with  
214 intersecting paths at the time of analysis. In addition to providing proportion of motile sperm (MOT),  
215 we used the following standard average measures of sperm kinematics data generated by CASA for  
216 each sample for PCA analysis (see “statistics” below): straight-line velocity (VSL), curvilinear velocity  
217 (VCL), average path velocity (VAP), amplitude of lateral head displacement (ALH), beat cross  
218 frequency (BCF), linearity of movement (LIN), and proportion of progressively motile sperm (PMOT).  
219 Progressively motile sperm (i.e., sperm that were ‘going somewhere’ and not merely convulsing or  
220 turning in place) were defined as sperm with an average path velocity (VAP) of  $\geq 50 \mu\text{m/s}$  and a  
221 straightness index (STR) of 70% ( $\text{VSL/VAP} \geq 70\%$ ).

## 222 Mitochondrial Superoxide—Flow-cytometry fluorescence-activated cell sorting (FACS)

223 We followed previously published protocols for measuring mitochondrial superoxide (Ballen et al.,  
224 2012; Friesen et al., 2017b; Giraudeau et al., 2016). Briefly, an aliquot of a single sample of whole  
225 peripheral blood (10  $\mu$ l) was diluted immediately with 9 volumes of phosphate buffered saline (PBS;  
226 137 mM NaCl, 2.7 mM KCl, 1.5 mM KH<sub>2</sub>PO<sub>4</sub>, 8 mM Na<sub>2</sub>HPO<sub>4</sub>, pH 7.4) and stored on ice prior to FACS  
227 analyses that were completed within 2 hours of sampling. The remainder of the blood sample was  
228 kept on ice until centrifugation for plasma collection and subsequent storage at -80°C (3 hours  
229 after blood sampling) for later quantification of SOD. Prior to staining blood cells for mt-superoxide,  
230 the diluted blood was further diluted 50-fold in PBS and then centrifuged (300 g for 5 min) to pellet  
231 blood cells. Cells were resuspended in 100  $\mu$ l of PBS containing 5  $\mu$ M MitoSOX Red (MR; Molecular  
232 Probes, Invitrogen, Life Technologies, Sydney, Australia). MR was added from stock solutions in  
233 dimethylsulfoxide (DMSO); the final concentration of DMSO was 0.2% (v/v) or less. Cells were  
234 subsequently incubated at 35°C for 30 min then washed with PBS by centrifugation as described  
235 above and held on ice until analysed by flow cytometry; 50,000 events (cells) were acquired for all  
236 samples. Flow cytometry was performed using an Accuri C6 flow cytometer (BD Accuri Cytometers,  
237 Ann Arbor, MI, USA) with excitation at 488 nm and emitted fluorescence collected using band pass  
238 filters of 575  $\pm$  13 nm. Data were acquired and analyzed using BD Accuri C6 Software. On the basis of  
239 forward angle laser scatter and side angle laser scatter, a number of blood cell populations were  
240 discerned; the results obtained were similar for all these populations. For each sample, the  
241 arithmetic mean fluorescence for all 50,000 cells acquired was determined using Accuri C6 software  
242 and used to compare between samples and treatments. (A pilot experiment determined that the  
243 particulate matter in the semen samples precluded measurement of mitochondrial superoxide  
244 production in sperm with flow cytometry).

## 245 Superoxide dismutase activity

246 We followed the same protocol described in (Olsson et al., 2012a; Olsson et al., 2012b) to assay SOD  
247 in blood plasma samples collected within five minutes of semen collection. Briefly, we used the

248 Superoxide Dismutase Assay Kit II (catalogue no. 574601, Calbiochem, supplied by Merck Pty Ltd.,  
249 Victoria, Australia). This kit is designed to generate superoxide radicals with xanthine oxidase and  
250 hypoxanthine. The superoxide radicals are dismutated by SOD in the plasma sample to molecular  
251 oxygen and hydrogen peroxide and detected by tetrazolium salt. This SOD assay measures all three  
252 types of SOD (Cu/Zn-, Mn- and Fe-SOD). Absorbance measurements were taken using a microplate  
253 reader (Pherastar®FSX, BMG Labtech, Mornington, Victoria, Australia). The optimal plasma sample  
254 dilution was determined to be a factor of 48 in previous studies (Olsson et al., 2012b). Standards and  
255 samples were run in duplicate and were placed randomly on the plates for intra-assay precision. The  
256 correlation coefficient between two samples from the same individual was  $r = 0.883$ ,  $P < 0.0001$ . One  
257 unit of SOD activity is defined as the amount of enzyme needed to exhibit 50 % dismutation of the  
258 superoxide radical to hydrogen peroxide.

## 259 *Statistical analysis*

### 260 *Data preparation*

261 We calculated body condition (BCI) as the standardized residuals (mean = 0; standard deviation =1)  
262 from linear regressions of  $\ln(\text{body mass})$  as a function of  $\ln(\text{SVL})$  in all males not just those that  
263 mated (Olsson et al., 2009a).

264 After inspection of a normal Q-Q plot and the failure of Shapiro-Wilk tests of normality,  
265 mean fluorescence values of mitochondrial superoxide (henceforth “mtSOx”:  $W = 0.858$ ,  $P < 0.001$ )  
266 and superoxide dismutase activity (SOD:  $W = 0.883$ ,  $P = 0.003$ ) were  $\ln$ -transformed to improve  
267 normality (mtSOx:  $W = 0.961$ ,  $P = 0.317$ ; SOD:  $W = 0.993$ ,  $P = 0.999$ ) and reduce heteroscedasticity.  
268 Hereafter, mtSOx and SOD refer to these transformed variables unless otherwise stated.

269 A priori, we wanted to assess proportions of motile (MOT) and progressively motile (PMOT)  
270 sperm. MOT is one of the most commonly reported sperm performance parameters while PMOT is a  
271 useful holistic indicator of efficient mitochondrial function, membrane integrity and fertilization  
272 success in most species studied to date, including for example, humans, horses, ram, rabbit and

273 poultry (De Graaf et al., 2006; Froman and Feltmann, 2000; Froman and Kirby, 2005; Johninke et al.,  
274 2014; Quintero-Moreno et al., 2003; Rickard et al., 2014; Simon and Lewis, 2011). PMOT captures  
275 both velocity and path straightness and also scales to the relative population size of progressively  
276 motile sperm in the ejaculate. However, it is unclear how these two variables and the other six  
277 kinematic parameters generated by CASA are related.

278 Initial data exploration of MOT, VSL, VCL, VAP, ALH, BCF, LIN, and PMOT showed they are  
279 indeed correlated ( $|r|$  range: 0.276-0.973). Rather than run multiple separate analyses with each  
280 sperm kinematics parameter, following Helfenstein et al. (2010), we chose to reduce these eight  
281 dimensions into one variable using principle component analysis with varimax orthogonal rotation in  
282 SPSS 24. The first axis (PC1), which we call “sperm performance” and Helfenstein et al. (2010a) call  
283 “swimming ability”, explained 69.73% of the variance in the kinematic parameters. All kinematic  
284 parameters were significantly correlated with PC1 after rotation (Listed here in order of increasing  
285 strength of positive correlation with PC1: LIN, ALH, MOT, PMOT, VCL, VAP, VSL;  $r$  ranged 0.663-  
286 0.994, all  $p < 0.0001$ ; BCF (beat frequency) had a significantly negative correlation with PC1  $r = -$   
287 0.578,  $P < 0.0001$ ). Thus, individuals with relatively large and positive values of PC1 can be described  
288 as having proportionally more sperm that swim relatively fast and straight and were more efficient  
289 given the negative correlation with beat frequency.

#### 290 *Significance tests*

291 We report basic comparisons of mass, SVL and body condition between bib-morphs at time of  
292 capture and at mating. We fit separate models including one covariate of interest (BCI, mtSOx, SOD)  
293 and its interaction with bib-morph. Therefore, we chose to conduct significance tests on three  
294 separate relationships using restricted maximum likelihood (REML) estimated Generalized Linear  
295 Models (GLM; normal distribution, identity link function) with Satterthwaite approximated degrees  
296 of freedom and robust covariance estimation to manage unbalanced sample sizes in IBM® SPSS®  
297 version 24. All models reported here initially included main effects of bib-morph and the covariate of  
298 interest as well as their interaction.

299 *Figures*

300 We included separate regression lines for each 'morph' in all plots regardless of significance. All plots  
301 and R<sup>2</sup> values (when reported) for these simple linear regressions (SLR) were generated in  
302 SigmaPlot® 13.0 (Systat Software, Inc. San Jose CA, USA).

303 *Results*

304 Of the males that mated and were used for sperm collection, bibbed males were slightly but  
305 significantly longer than non-bibbed males (at capture SVL:  $F_{1,29} = 5.578$ ,  $P = 0.025$ ); SVL did not  
306 change in the acclimation period. Bibbed and non-bibbed males did not differ significantly in mass or  
307 body condition at the time of capture or mating (all  $P \geq 0.119$ ) although all males gained an average  
308  $\pm$  se of  $0.626 \pm 0.229$ g or 4.95% ( $5.9 \pm 202\%$ ) in this period ( $F_{1,29} = 6.820$ ,  $P = 0.014$ ).

309 *Relationship between body condition and superoxide dismutase activity*

310 SOD activity and body condition given previous studies on morph-specific decreases in body  
311 condition (Healey and Olsson, 2009a; Olsson et al., 2009a), and body condition and SOD should be  
312 related to somatic maintenance (Friesen et al., 2017b; Olsson et al., 2018; Rollings et al., 2017). Is  
313 there a positive relationship between body condition and SOD activity related to body condition in a  
314 morph-specific manner?

315 Superoxide dismutase activity, measured at the time of mating, was positively related to body  
316 condition at time of capture ( $SOD \sim BIC_{capture}$ :  $r = 0.336$ ,  $F_{1,29} = 4.465$ ,  $P = 0.043$ ) suggesting that SOD  
317 activity is influenced by condition early in the breeding season **Figure 2** . Although BCI increased  
318 from time of capture to time of mating in the lab, SOD activity decreased over the sampling period  
319 ( $SOD \sim date$ :  $r = -0.355$ ,  $F_{1,29} = 4.193$ ,  $P = 0.050$ ). At the time of each individual male's mating, BCI did  
320 not have an significant main effect on SOD activity, however, SOD activity increased with BCI in non-  
321 bibbed males, but not in bibbed males ( $Bib \times BCI_{mating}$ ,  $P = 0.015$ ; **Table 1**), and non-bibbed males had  
322 higher SOD activity than bibbed males ( $P = 0.041$ ).

323 [Relationship between mitochondrial superoxide \(mtSOx\) and SOD](#)

324 Oxidative stress is caused by an imbalance between free radical production and antioxidant  
325 defences (Monaghan et al., 2009), and bib-morphs may differ in allocation strategies with  
326 downstream effects on regulation and expression of SOD or SOD isozymes. Does SOD activity  
327 effectively reduce mtSO levels in a morph-specific manner?

328 We modelled mtSOx levels as a function of SOD and bib as main effects and the interaction between  
329 them. Overall, mtSOx tended to decrease with increasing SOD activity ( $P = 0.012$ ) **Table 2; Figure 3**.  
330 Superoxide levels increased significantly over the course of the sampling period ( $r = 0.564$ ,  $F_{1,29} =$   
331  $13.526$ ,  $P = 0.001$ ).

332 [Relationship between mitochondrial superoxide and sperm kinematic parameters](#)

333 Sperm are particularly sensitive to free radical damage (Gomendio et al., 2011; Koppers et al., 2008;  
334 Tremellen, 2008). Does mtSO negatively affect sperm movement (MOT) and performance (PC1 and  
335 PMOT) in a morph-specific manner?

336 We constructed GLMs with bib, superoxide levels and their interaction as independent variables and  
337 three different kinematic parameters as response variables: MOT, PMOT and PC1 or “sperm  
338 performance” **Tables 3a-c**. Sperm motility was significantly and negatively related to superoxide  
339 levels ( $P = 0.001$ ), but motility did not differ between bib-morphs ( $P = 0.358$ ) **Figure 4**. Superoxide  
340 levels (mtSOx) negatively affected both sperm performance (PC1) and the proportion of PMOT ( $P \leq$   
341  $0.014$ ). Progressive motility of sperm declined in both morphs, but more steeply in bibbed males (bib  
342 x mtSOx  $P = 0.036$ : **Figure 5a**). While sperm performance (PC1) declined with increasing mtSOx levels  
343 in bibbed males (bib x mtSOx,  $P = 0.038$  **Figure 5b**), no such decline occurred in non-bibbed males.

344

345 [Discussion](#)

346 We investigated prospective links between body condition, antioxidant defences (SOD), whether  
347 antioxidant levels affected ROS levels (mtSOX) and finally whether ROS levels affected sperm

348 performance of bib- and non-bibbed male painted dragon lizards. Our results suggest that somatic  
349 levels of ROS production and antioxidant protection are associated with sperm performance.  
350 Mitochondrial superoxide (mtSOx), measured in blood cells (somatic), is negatively associated with  
351 the proportion of motile sperm (MOT) and the proportion of progressively motile sperm (PMOT) in  
352 both bib-morphs (**Figure 3**). Similar to McDiarmid et al. (2017), we did not find bib-morph specific  
353 differences in sperm kinematic parameters. Nevertheless, there were differences in the association  
354 of blood cell superoxide level on progressive sperm motility between bib-morphs. The negative  
355 effect of superoxide levels was more pronounced in bibbed males and overall progressive motility  
356 was lower in bibbed males at the highest levels of blood mtSOx (**Figure 5a**) and are greatest on  
357 overall sperm performance (represented by PC1, **Figure 5b**). Sperm performance seems to be  
358 strongly affected by oxidative status in bibbed males, but not in non-bibbed males, which may  
359 indicate that the sperm of bibbed males were more sensitive to mtSOx or their superoxide  
360 dismutase activity was able to keep pace and quench excess mtSOx. Indeed, superoxide dismutase  
361 (SOD) levels were highest in non-bibbed males (**Table 1**) and SOD activity was negatively related with  
362 mtSOX (**Table 2**). The link between SOD activity and body condition suggests a trade-off between the  
363 allocation of resources to aggressive behaviour and bib maintenance on one hand and buffering  
364 against the negative effect of superoxide on sperm performance in non-bibbed males on the other.

365 As predicted, SOD activity, in both bibbed and non-bibbed males, was positively related to  
366 body condition (BCI) at the time of capture. Thus, SOD activity measured a ~month after body  
367 condition measures were taken had a lingering positive indicating that SOD activity may depends  
368 available resources at the time of production. However, the relationship of SOD activity and BCI  
369 measured at the time of mating is more complex. In non-bibbed males, BCI at mating was positively  
370 related to SOD activity, but not in bibbed males. Indeed, SOD levels were significantly lower in  
371 bibbed males than non-bibbed males even after accounting for body condition at the time of mating.

372 Positive links between color traits, oxidative stress and sperm performance have been  
373 demonstrated in a few species, such as Helfenstein et al. (2010) work on great tits and the positive  
374 association between color, immunocompetence and sperm performance demonstrated by Peters et  
375 al. (2004) in mallards. However, other comprehensive studies find clear links between oxidative  
376 stress and color. Rojas Mora et al. (2016) found that the ratio of oxidised over reduced glutathione  
377 (an endogenous antioxidant that quenches hydrogen peroxide, a downstream product of superoxide  
378 dismutation by SOD) in the ejaculate of house sparrows (*Passer domesticus*) was negatively  
379 correlated with the size of a melanin-based breast badge, thus indicating an allocation trade-off  
380 between badge size and ejaculate antioxidants. Nevertheless, ejaculate quality in the house sparrow  
381 was not directly related to any oxidant or antioxidant measurement (Rojas Mora et al., 2016). In a  
382 follow up paper, experimental increases in oxidative stress in the same species of sparrow (dosing  
383 males with the pro-oxidant, diquat) increased antioxidant levels in the ejaculate but diquat dosing  
384 still reduced sperm velocity with *the least* aggressive/dominant birds being the most strongly  
385 affected, probably due to socially mediated decreases in access to food resources—or condition  
386 dependence (Rojas Mora et al., 2017a). In this same study superoxide dismutase was also correlated  
387 with sperm motility in this species and social status consistent with a trade-off between dominance  
388 and sperm competitiveness (Rojas Mora et al., 2017b). Initiating aggression is a critical determinant  
389 of winning male-male contests in painted dragons and bibbed males are the more aggressive of the  
390 bib-morphs (McDiarmid et al., 2017). Thus, our results suggest an opposite trend to that of the wild  
391 house sparrows as relative superoxide levels most strongly affect the sperm performance of the  
392 more aggressive bibbed males. In house sparrows, aggressive and dominant individuals also have  
393 greater access to resources which may have generated a soma-germline trade off that strongly  
394 reduced sperm velocity in the least dominant males, but was less prevalent in dominate males due  
395 to increased resources which reduced the strength of the trade-off (Rojas Mora et al., 2017a).  
396 However, in our study, males were not allowed to interact and were fed to satiety every other day  
397 so socially mediated differential in resource limitation is not a plausible explanation of our results.



398 Below we consider non-mutually exclusive hypotheses that may better explain this result  
399 suggesting further avenues of study. First, the temporal difference in these two condition dependent  
400 relationships with SOD, and the morph-specific differences in SOD may be related to the decrease in  
401 SOD and increase in mtSOx over the course of our sampling period. Second, morph-specific SOD  
402 turnover rates due to initial condition having a lasting effect on SOD activity may also explain the  
403 breakdown in the relationship between BCI and SOD at the time of mating. Indeed, bibbed-morphs  
404 have higher metabolic rates than non-bibbed morphs (Friesen et al., 2017a). Thermal effects, with its  
405 affects metabolic rate, on SOD turnover rates may explain the relatively high variability of mtSOx  
406 levels previously described in male painted dragons subjected to “hot-long and cold-short” basking  
407 regimes (Ballen et al., 2012), where “cold” treatment males reduced mtSOx levels more during  
408 activity than “hot” basking males. Regrettably, data on SOD turnover rates in animal taxa other than  
409 mammals (i.e., mice, rats and humans) are sparse and temperature dependent rates in ectotherms is  
410 in need of further research. However, we can estimate turnover rates in these dragons because  
411 metabolic rate is linked to stoichiometry of protein and other macromolecular turnover across taxa  
412 (Hulbert and Else, 2000).

413 Some mammalian cellular proteins like histones (H3.1) and nuclear pore complex proteins  
414 (Nup205) persist nearly a year *in vivo* (Toyama et al., 2013), but most proteins have half-lives of only  
415 45 minutes to 22.5 hours (Eden et al., 2011). Among proteins, superoxide dismutase is relatively  
416 long-lived (Valentine et al., 2005) with a half-life of 45-80 hours for SOD expressed in mice kidneys  
417 (Crisp et al., 2015; Hoffman et al., 1996). Nevertheless, the standard/basal metabolic rate of a 13g  
418 mouse (e.g., *Mus spp.*) is nearly 5.5x higher than that of a 13 g painted dragon, (0.09ml/min\*60 =  
419 5.4ml/hr; Friesen et al., 2017a; mouse 29.78mlO<sub>2</sub>/hr; Withers, 1992, pg 95). Furthermore, non-  
420 specific protein synthesis rates in mice are ~4.8x faster than in lizards (Sayegh and Lajtha, 1989;  
421 Warne et al., 2010) and isotopic nitrogen turnover rates yield similar values (Vander Zanden et al.,  
422 2015; Warne et al., 2010). Assuming that this inter-taxonomic factorial adjustment is reasonable, the  
423 degradation rate of SOD in a lizard is probably 4.8-5.5x slower than in a mouse, which translates to a

424 SOD half-life of 9-18 days in painted dragons. Given the upper end of this half-life range, BCI taken at  
425 capture could plausibly influence SOD activity 21-50 days later, which might explain the effect of  
426 early season condition on later SOD activity. As bibbed males have higher resting metabolic rates  
427 than non-bibbed males (Friesen et al., 2017a), they might have had faster degradation of SOD, which  
428 could explain the disappearance of the positive relationship between SOD and BCI at mating in  
429 bibbed males, but not non-bibbed males.

430 Another, albeit more speculative and interesting, hypothesis is that different variants of SOD  
431 or mitochondrial genes may be linked to bib expression. For example, amyotrophic lateral sclerosis  
432 (ALS) is associated with oxidative damage of neuronal axons (Oeda et al., 2001), and mutations in  
433 SOD (>100 functional ALS mutations) are linked with 20-25% of ALS cases in humans (Valentine et  
434 al., 2005). Thus, bibbed and non-bibbed males may have different genetic variants of SOD genes that  
435 affect oxidative status and is linked to condition. Nutrition and condition may also affect  
436 mitochondrial function (Ballard and Youngson, 2015) and exogenous antioxidants could certainly  
437 play a role (Monaghan et al., 2009). However, in painted dragons, supplementation with vitamin E  
438 (an antioxidant) does not increase longevity in the wild (Healey and Olsson, 2009b) and  
439 supplementation with dietary carotenoids does not reduce the effects of ROS on color maintenance  
440 (Olsson et al., 2008). Nevertheless, dietary antioxidants may affect sperm function and this merits  
441 further research. Supplementation with a SOD mimetic, EUK 134, reduces age-related color fading  
442 associated with oxidative stress (Olsson et al., 2012b). We did not measure color in this study so we  
443 cannot directly assess the link between bib color saturation and sperm performance. McDiarmid et  
444 al. (2017), however did not find a significant relationship between bib saturation and two measures  
445 of sperm function, motility (MOT) and velocity (VAP,) which is consistent with the meta-analysis of  
446 Mautz et al. (2013) that found no significant correlations between color traits and sperm kinematic  
447 performance, but may be manifest if males were allowed to socially interact within the natural  
448 “mating system” in the wild (Lupold et al., 2014).

449 Bibbed males have higher metabolic rates (Friesen et al., 2017a) and shorter telomeres than  
450 non-bibbed males (Rollings et al., 2017), and telomere shortening is linked with oxidative stress  
451 (Monaghan, 2010; Olsson et al., 2018; Olsson et al., 2017). Perhaps the different nuclear genetic  
452 backgrounds of bibbed and non-bibbed males create different mitonuclear interactions that might  
453 explain the greater metabolic rates and generation of superoxide (Ballard and Melvin, 2010; Hill et  
454 al.), which affects ageing and sperm performance in bibbed males. Different mtDNA haplotypes in  
455 mice (*Mus* sp.) with common nuclear background have similar respiration rates but differ in their  
456 production of reactive oxygen species (Moreno-Loshuertos et al., 2006). In humans, reduced sperm  
457 motility is associated with particular mtDNA haplotypes and oxidative damage (Ruiz-Pesini et al.,  
458 2000) as is metabolic rate, health and ageing (Latorre-Pellicer et al., 2016; Tranah et al., 2011).

459 Mitochondrial DNA (mtDNA), which 'codes' for important protein subunits in all complexes  
460 of the ETC, is prone to ROS damage because it is not protected by histones (Ballard and Whitlock,  
461 2004). Over time, damage to mtDNA by oxidative stress or replication errors can affect the efficiency  
462 of electron transfer and increase superoxide production in mitochondria, and many age related  
463 human diseases are associated with lesions on mtDNA that accumulate throughout life. Thus, the  
464 increases in superoxide production and depletion of SOD documented in this study may also indicate  
465 aging (Balaban et al., 2005).

466 In the wild, male painted dragons lose mass through the breeding season which ends in late  
467 December to mid-January; 90% of adults do not survive through winter 'hibernation' (beginning in  
468 late May) to the next breeding season (in September) (Healey and Olsson, 2009a; Olsson et al.,  
469 2007b; Olsson et al., 2009a). The increase in superoxide and decrease in SOD throughout the  
470 sampling period we describe here is consistent with senescence manifest in weight loss, DNA  
471 damage, telomere shortening, and color fading across the breeding season in this species (Giraudeau  
472 et al., 2016; Olsson et al., 2012b; Rollings et al., 2017). We tested mtSOx in blood cells, but the  
473 mitochondrial proteins in sperm cells are the same as those in blood cells and should generate

474 similar levels of SOx. Mitochondrial function and superoxide production is affected by the stress  
475 response (Manoli et al., 2007), and, if bib-morphs differ in their resilience to stress, this may explain  
476 different sensitivities of sperm to ROS. Spermatogenesis is ongoing throughout the breeding season  
477 in painted dragons, indicated by testicular enlargement persisting August through late December  
478 (Niejalko, 2006). Condition earlier in the season during spermatogenesis may have a strong influence  
479 on sperm damage and concomitant sensitivity to oxidative damage later in the season as our males  
480 were held without access to females prior to mating trials and sperm collection. This would  
481 constitute a trade-off between aggression typical of bibbed males and resilient sperm of non-bibbed  
482 males.

### 483 [Conclusions](#)

484 In bibbed males, condition seems to be an important factor that relates indirectly to sperm  
485 performance via SOD activity. There are multiple functions of testes, and protecting sperm from  
486 damage is paramount as sperm are very sensitive to superoxide and sperm performance is critical to  
487 male fertilization success. Female painted dragons store and use sperm across clutches (Olsson et  
488 al., 2009b), thus there may be a selective advantage for sperm viability and longevity (Dziminski et  
489 al., 2009; Fitzpatrick et al., 2009). It is important to consider potentially negative transgenerational  
490 effects of sperm damage which strongly affects offspring viability and increased likelihood of disease  
491 in humans (Aitken et al., 2014). Female dragons may use sperm storage as a mechanism to 'test'  
492 damaged sperm as a form of cryptic female choice.

### 493 [Competing interests statement](#)

494 We have no competing interests.

### 495 [Author contributions](#)

496 All authors contributed materially and intellectually to this experiment and manuscript.

## 497 Acknowledgements

498 Dr Danielle Johninke for tutorial on CASA and FACS. Dr Emily Uhrig for useful and sagacious comments  
499 and edits. Dr Cissy Ballen for lizard husbandry and sperm collection. Dr Adele Haythornthwaite for  
500 administrative assistance. NSW National Parks service for permits and access to Yathong Nature  
501 Reserve, especially E. Snaith. National Science Foundation funding to CRF and Australian Research  
502 Council funding to SdG and MO.

## 503 Data, code and materials

504 Data will be deposited to <http://datadryad.org/> upon acceptance of the manuscript.

505

## 506 References

- 507 Aitken RJ, Clarkson JS, Fishel S, 1989. Generation of reactive oxygen species, lipid peroxidation, and  
508 human sperm function. *Biol Reprod* 41:183-197.
- 509 Aitken RJ, Graves JAM, 2002. Human spermatozoa: The future of sex. *Nature* 415:963-963.
- 510 Aitken RJ, Roman SD, 2008. Antioxidant systems and oxidative stress in the testes. *Oxidative Medicine*  
511 *and Cellular Longevity* 1:15-24.
- 512 Aitken RJ, Smith TB, Jobling MS, Baker MA, De Lullis GN, 2014. Oxidative stress and male reproductive  
513 health. *Asian Journal of Andrology* 16:31.
- 514 Andreyev A, Kushnareva Y, Murphy A, Starkov A, 2015. Mitochondrial ROS metabolism: 10 years later.  
515 *Biochemistry Biokhimiia* 80:517.
- 516 Balaban RS, Nemoto S, Finkel T, 2005. Mitochondria, oxidants, and aging. *Cell* 120:483-495. doi:  
517 <http://dx.doi.org/10.1016/j.cell.2005.02.001>.
- 518 Ballard J, Melvin R, 2010. Linking the mitochondrial genotype to the organismal phenotype. *Mol Ecol*  
519 19:1523-1539.
- 520 Ballard JWO, Whitlock MC, 2004. The incomplete natural history of mitochondria. *Mol Ecol* 13:729-  
521 744.
- 522 Ballard JWilliam O, Youngson Neil A, 2015. Review: Can diet influence the selective advantage of  
523 mitochondrial DNA haplotypes? *Bioscience Reports* 35. doi: 10.1042/bsr20150232.
- 524 Ballen C, Healey M, Wilson M, Tobler M, Wapstra E, Olsson M, 2012. Net superoxide levels: Steeper  
525 increase with activity in cooler female and hotter male lizards. *J Exp Biol* 215:731-735.
- 526 Cogger HG, 2014. *Reptiles and amphibians of Australia*. Collingwood, VIC, Australia: CSIRO Publishing.
- 527 Costantini D, 2008. Oxidative stress in ecology and evolution: lessons from avian studies. *Ecol Lett*  
528 11:1238-1251.
- 529 Costantini D, 2014. *Oxidative stress and hormesis in evolutionary ecology and physiology : A marriage*  
530 *between mechanistic and evolutionary approaches*. New York: Springer Science + Business  
531 Media.
- 532 Crisp MJ, Mawuenyega KG, Patterson BW, Reddy NC, Chott R, Self WK, Wehl CC, Jockel-Balsarotti J,  
533 Varadhachary AS, Bucelli RC, Yarasheski KE, Bateman RJ, Miller TM, 2015. In vivo kinetic  
534 approach reveals slow SOD1 turnover in the CNS. *The Journal of Clinical Investigation*  
535 125:2772-2780. doi: 10.1172/JCI80705.
- 536 Dávila F, Aron S, 2017. Protein restriction affects sperm number but not sperm viability in male ants. *J*  
537 *Insect Physiol* 100:71-76.

- 538 De Graaf S, Evans G, Maxwell W, O'Brien J, 2006. In vitro characteristics of fresh and frozen–thawed  
539 ram spermatozoa after sex sorting and re-freezing. *Reprod Fertil Dev* 18:867-874.
- 540 delBarco-Trillo J, Roldan ERS, 2014. Effects of metabolic rate and sperm competition on the fatty-acid  
541 composition of mammalian sperm. *J Evol Biol* 27:55-62. doi: 10.1111/jeb.12275.
- 542 Dines JP, Mesnick SL, Ralls K, May-Collado L, Agnarsson I, Dean MD, 2015. A trade-off between  
543 precopulatory and postcopulatory trait investment in male cetaceans. *Evolution* 69:1560-  
544 1572. doi: 10.1111/evo.12676.
- 545 Dowling DK, Simmons LW, 2009. Reactive oxygen species as universal constraints in life-history  
546 evolution. *Proc R Soc B* 276:1737-1745.
- 547 Dunn JC, Halenar LB, Davies TG, Cristobal-Azkarate J, Reby D, Sykes D, Dengg S, Fitch WT, Knapp LA,  
548 2015. Evolutionary trade-off between vocal tract and testes dimensions in howler monkeys.  
549 *Curr Biol* 25:2839-2844. doi: 10.1016/j.cub.2015.09.029.
- 550 Dziminski MA, Roberts JD, Beveridge M, Simmons LW, 2009. Sperm competitiveness in frogs: slow  
551 and steady wins the race. *Proc R Soc B-Biol Sci* 276:3955-3961. doi: 10.1098/rspb.2009.1334.
- 552 Eden E, Geva-Zatorsky N, Issaeva I, Cohen A, Dekel E, Danon T, Cohen L, Mayo A, Alon U, 2011.  
553 Proteome half-life dynamics in living human cells. *Science* 331:764-768. doi:  
554 10.1126/science.1199784.
- 555 Finkel T, Holbrook NJ, 2000. Oxidants, oxidative stress and the biology of ageing. *Nature* 408:239-247.
- 556 Firman RC, Simmons LW, 2010. Experimental evolution of sperm quality via postcopulatory sexual  
557 selection in house mice. *Evolution* 64:1245-1256.
- 558 Fitzpatrick JL, Almbro M, Gonzalez-Voyer A, Kolm N, Simmons LW, 2012. Male contest competition  
559 and the coevolution of weaponry and testes in pinnipeds. *Evolution* 66:3595-3604. doi:  
560 10.1111/j.1558-5646.2012.01713.x.
- 561 Fitzpatrick JL, Lupold S, 2014. Sexual selection and the evolution of sperm quality. *Mol Human Reprod*  
562 20:1180-1189. doi: 10.1093/molehr/gau067.
- 563 Fitzpatrick JL, Montgomerie R, Desjardins JK, Stiver KA, Kolm N, Balshine S, 2009. Female promiscuity  
564 promotes the evolution of faster sperm in cichlid fishes. *Proc Natl Acad Sci USA* 106:1128-  
565 1132.
- 566 Fridovich I, 1995. Superoxide radical and superoxide dismutases. *Annu Rev Biochem* 64:97-112.
- 567 Friesen CR, Johansson R, Olsson M, 2017a. Morph-specific metabolic rate and the timing of  
568 reproductive senescence in a color polymorphic dragon. *J Exp Zool A Ecol Integr Physiol*  
569 327:433-443. doi: 10.1002/jez.2118.
- 570 Friesen CR, Shine R, Krohmer RW, Mason RT, 2013. Not just a chastity belt: the functional significance  
571 of mating plugs in garter snakes, revisited. *Biol J Linn Soc* 109:893-907. doi:  
572 10.1111/bij.12089.
- 573 Friesen CR, Squire MK, Mason RT, 2014. Intrapopulational variation of ejaculate traits and sperm  
574 depletion in red-sided garter snakes. *J Zool* 292:192-201. doi: 10.1111/jzo.12092.
- 575 Friesen CR, Wilson MR, Rollings N, Sudyka J, Whittington CM, Giraudeau M, Olsson M, 2017b.  
576 Conditional handicaps in exuberant lizards: bright color in aggressive males is correlated with  
577 high levels of free radicals. *Frontiers in Ecology and Evolution* 5. doi:  
578 10.3389/fevo.2017.00001.
- 579 Froman D, Feltmann A, 2000. Sperm mobility: Phenotype in roosters (*Gallus domesticus*) determined  
580 by concentration of motile sperm and straight line velocity. *Biol Reprod* 62:303-309.
- 581 Froman DP, Kirby JD, 2005. Sperm mobility: phenotype in roosters (*Gallus domesticus*) determined by  
582 mitochondrial function. *Biol Reprod* 72:562-567.
- 583 Garratt M, Bathgate R, de Graaf SP, Brooks RC, 2013. Copper-zinc superoxide dismutase deficiency  
584 impairs sperm motility and in vivo fertility. *Reproduction* 146:297-304.
- 585 Giraudeau M, Friesen CR, Sudyka J, Rollings N, Whittington CM, Wilson MR, Olsson M, 2016. Ageing  
586 and the cost of maintaining coloration in the Australian painted dragon. *Biol Lett* 12. doi:  
587 10.1098/rsbl.2016.0077.

- 588 Gomendio M, Tourmente M, Roldan E, 2011. Why mammalian lineages respond differently to sexual  
589 selection: metabolic rate constrains the evolution of sperm size. *Proc R Soc B* 278:3135.
- 590 Healey M, Olsson M, 2009a. Too big for his boots: Are social costs keeping condition-dependent  
591 status signalling honest in an Australian lizard? *Austral Ecol* 34:636-640. doi: 10.1111/j.1442-  
592 9993.2009.01968.x.
- 593 Healey M, Olsson M, 2009b. Vitamin E does not elevate survival in free-ranging lizards. *Copeia*  
594 2009:339-341.
- 595 Healey M, Uller T, Olsson M, 2007. Seeing red: Morph-specific contest success and survival rates in a  
596 colour-polymorphic agamid lizard. *Anim Behav* 74:337-341.
- 597 Helfenstein F, Losdat S, Møller AP, Blount JD, Richner H, 2010. Sperm of colourful males are better  
598 protected against oxidative stress. *Ecol Lett* 13:213-222.
- 599 Hill GE, Havird JC, Sloan DB, Burton RS, Greening C, Dowling DK, Assessing the fitness consequences of  
600 mitonuclear interactions in natural populations. *Biol Rev* 0. doi: doi:10.1111/brv.12493.
- 601 Hoffman EK, Wilcox HM, Scott RW, Siman R, 1996. Proteasome inhibition enhances the stability of  
602 mouse Cu Zn superoxide dismutase with mutations linked to familial amyotrophic lateral  
603 sclerosis. *J Neurol Sci* 139:15-20. doi: 10.1016/0022-510X(96)00031-7.
- 604 Hulbert A, Else PL, 2000. Mechanisms underlying the cost of living in animals. *Annual Review of*  
605 *Physiology* 62:207-235.
- 606 Huxley J, 1955. Morphism and evolution. *Heredity* 9:1-51.
- 607 Johnke D, de Graaf S, Bathgate R, 2014. Investigation of in vitro parameters and in vivo fertility of  
608 rabbit spermatozoa after chilled storage. *Anim Reprod Sci* 147:135-143.
- 609 Kahrl AF, Cox CL, Cox RM, 2016. Correlated evolution between targets of pre - and postcopulatory  
610 sexual selection across squamate reptiles. *Ecol Evo* 6:6452-6459.
- 611 Kahrl AF, Cox RM, 2015. Diet affects ejaculate traits in a lizard with condition-dependent fertilization  
612 success. *Behav Ecol* 26:1502-1511.
- 613 Ko EY, Sabanegh ES, Agarwal A, 2014. Male infertility testing: Reactive oxygen species and antioxidant  
614 capacity. *Fertility and Sterility* 102:1518-1527.
- 615 Koppers A, De Iulius G, Finnie J, McLaughlin E, Aitken R, 2008. Significance of mitochondrial reactive  
616 oxygen species in the generation of oxidative stress in spermatozoa. *J Clin Endocrin Met*  
617 93:3199.
- 618 Latorre-Pellicer A, Moreno-Loshuertos R, Lechuga-Vieco AV, Sánchez-Cabo F, Torroja C, Acín-Pérez R,  
619 Calvo E, Aix E, González-Guerra A, Logan A, Bernad-Miana ML, Romanos E, Cruz R, Cogliati S,  
620 Sobrino B, Carracedo Á, Pérez-Martos A, Fernández-Silva P, Ruíz-Cabello J, Murphy MP, Flores  
621 I, Vázquez J, Enríquez JA, 2016. Mitochondrial and nuclear DNA matching shapes metabolism  
622 and healthy ageing. *Nature* 535:561. doi: 10.1038/nature18618
- 623 <https://www.nature.com/articles/nature18618#supplementary-information>.
- 624 Locatello L, Rasotto M, Evans J, Pilastro A, 2006. Colourful male guppies produce faster and more  
625 viable sperm. *J Evol Biol* 19:1595-1602.
- 626 Lupold S, Tomkins JL, Simmons LW, Fitzpatrick JL, 2014. Female monopolization mediates the  
627 relationship between pre- and postcopulatory sexual traits. *Nature Communications* 5:1-8.  
628 doi: 10.1038/ncomms4184.
- 629 Manoli I, Alesci S, Blackman MR, Su YA, Rennert OM, Chrousos GP, 2007. Mitochondria as key  
630 components of the stress response. *Trends in Endocrinology & Metabolism* 18:190-198. doi:  
631 <http://dx.doi.org/10.1016/j.tem.2007.04.004>.
- 632 Mattson KJ, Vries AD, McGuire SM, Krebs J, Louis EE, Loskutoff NM, 2007. Successful artificial  
633 insemination in the corn snake, *Elaphe gutatta*, using fresh and cooled semen. *Zoo Biol*  
634 26:363-369.
- 635 Mautz BS, Møller AP, Jennions MD, 2013. Do male secondary sexual characters signal ejaculate  
636 quality? A meta - analysis. *Biol Rev* 88:669-682.



- 637 McDiarmid CS, Friesen CR, Ballen C, Olsson M, 2017. Sexual coloration and sperm performance in the  
638 Australian painted dragon lizard, *Ctenophorus pictus*. J Evol Biol:n/a-n/a. doi:  
639 10.1111/jeb.13092.
- 640 Melville J, Schulte II JA, 2001. Correlates of active body temperatures and microhabitat occupation in  
641 nine species of central Australian agamid lizards. Austral Ecol 26:660-669. doi:  
642 10.1046/j.1442-9993.2001.01152.x.
- 643 Metcalfe NB, Alonso - Alvarez C, 2010. Oxidative stress as a life - history constraint: The role of  
644 reactive oxygen species in shaping phenotypes from conception to death. Funct Ecol 24:984-  
645 996.
- 646 Mitre R, Cheminade C, Allalume P, Legrand P, Legrand AB, 2004. Oral intake of shark liver oil modifies  
647 lipid composition and improves motility and velocity of boar sperm. Theriogenology 62:1557-  
648 1566.
- 649 Møller AP, 1988. Ejaculate quality, testes size and sperm competition in primates. J Hum Evol 17:479-  
650 488.
- 651 Monaghan P, 2010. Telomeres and life histories: The long and the short of it. Ann N Y Acad Sci  
652 1206:130-142. doi: 10.1111/j.1749-6632.2010.05705.x.
- 653 Monaghan P, Costantini D, 2014. Free Radicals—An Evolutionary Perspective. Systems Biology of Free  
654 Radicals and Antioxidants: Springer. p. 39-64.
- 655 Monaghan P, Metcalfe NB, Torres R, 2009. Oxidative stress as a mediator of life history trade-offs:  
656 Mechanisms, measurements and interpretation. Ecol Lett 12:75-92. doi: DOI 10.1111/j.1461-  
657 0248.2008.01258.x.
- 658 Moreno-Loshuertos R, Acín-Pérez R, Fernández-Silva P, Movilla N, Pérez-Martos A, de Cordoba SR,  
659 Gallardo ME, Enríquez JA, 2006. Differences in reactive oxygen species production explain the  
660 phenotypes associated with common mouse mitochondrial DNA variants. Nat Genet 38:1261-  
661 1268.
- 662 Murphy MP, 2009. How mitochondria produce reactive oxygen species. Biochemical Journal 417:1-13.
- 663 Nijelke DP, 2006. Reproduction by a small agamid lizard, *Ctenophorus pictus*, during contrasting  
664 seasons. Herpetologica 62:409-420.
- 665 Noguera JC, Dean R, Isaksson C, Velando A, Pizzari T, 2012. Age - specific oxidative status and the  
666 expression of pre - and postcopulatory sexually selected traits in male red junglefowl, *Gallus*  
667 *gallus*. Ecol Evo.
- 668 Oeda T, Shimohama S, Kitagawa N, Kohno R, Imura T, Shibasaki H, Ishii N, 2001. Oxidative stress  
669 causes abnormal accumulation of familial amyotrophic lateral sclerosis-related mutant SOD1  
670 in transgenic *Caenorhabditis elegans*. Hum Mol Genet 10:2013-2023.
- 671 Olsson M, 2001. 'Voyeurism' prolongs copulation in the dragon lizard *Ctenophorus fordi*. Behav Ecol  
672 Sociobiol 50:378-381.
- 673 Olsson M, Friesen CR, Rollings N, Sudyka J, Lindsay W, Whittington CM, Wilson M, 2018. Long term  
674 effects of superoxide and DNA repair on lizard telomeres. Mol Ecol 0. doi:  
675 doi:10.1111/mec.14913.
- 676 Olsson M, Healey M, Astheimer L, 2007a. Afternoon T: Testosterone level is higher in red than yellow  
677 male polychromatic lizards. Physiol Behav 91:531-534.
- 678 Olsson M, Healey M, Perrin C, Wilson M, Tobler M, 2012a. Sex-specific SOD levels and DNA damage in  
679 painted dragon lizards (*Ctenophorus pictus*). Oecologia 170:917-924. doi: 10.1007/s00442-  
680 012-2383-z.
- 681 Olsson M, Healey M, Wapstra E, Schwartz T, Lebas N, Uller T, 2007b. Mating system variation and  
682 morph fluctuations in a polymorphic lizard. Mol Ecol 16:5307-5315.
- 683 Olsson M, Healey M, Wapstra E, Uller T, 2009a. Testing the quality of a carrier: a field experiment on  
684 lizard signalers. Evolution International Journal of Organic Evolution 63:695.
- 685 Olsson M, Schwartz T, Uller T, Healey M, 2009b. Effects of sperm storage and male colour on  
686 probability of paternity in a polychromatic lizard. Anim Behav 77:419-424.



- 687 Olsson M, Tobler M, Healey M, Perrin C, Wilson M, 2012b. A significant component of ageing (DNA  
688 damage) is reflected in fading breeding colors: An experimental test using innate antioxidant  
689 memetics in painted dragon lizards. *Evolution* 66:2475-2483. doi: 10.1111/j.1558-  
690 5646.2012.01617.x.
- 691 Olsson M, Wapstra E, Friesen CR, 2017. Evolutionary Ecology of Telomeres: a Review. *Ann N Y Acad*  
692 *Sci In press*.
- 693 Olsson M, Wilson M, Isaksson C, Uller T, 2009c. Polymorphic ROS scavenging revealed by CCCP in a  
694 lizard. *Naturwissenschaften* 96:845-849.
- 695 Olsson M, Wilson M, Isaksson C, Uller T, Mott B, 2008. Carotenoid intake does not mediate a  
696 relationship between reactive oxygen species and bright colouration: Experimental test in a  
697 lizard. *J Exp Biol* 211:1257-1261.
- 698 Parapanov R, Nusslé S, Hausser J, Vogel P, 2008. Relationships of basal metabolic rate, relative testis  
699 size and cycle length of spermatogenesis in shrews (Mammalia, Soricidae). *Reprod Fertil Dev*  
700 20:431.
- 701 Parker GA, 1970. Sperm competition and its evolutionary consequences in insects. *Biol Rev Camb*  
702 *Philos Soc* 45:525-&. doi: 10.1111/j.1469-185X.1970.tb01176.x.
- 703 Parker GA, Lessells CM, Simmons LW, 2013. Sperm competition games: a general model for  
704 precopulatory male-male competition. *Evolution* 67:95-109. doi: 10.1111/j.1558-  
705 5646.2012.01741.x.
- 706 Parker GA, Pizzari T, 2010. Sperm competition and ejaculate economics. *Biological Reviews* 85:897-  
707 934. doi: 10.1111/j.1469-185X.2010.00140.x.
- 708 Peters A, Denk A, Delhey K, Kempenaers B, 2004. Carotenoid - based bill colour as an indicator of  
709 immunocompetence and sperm performance in male mallards. *J Evol Biol* 17:1111-1120.
- 710 Pitcher T, Rodd F, Rowe L, 2007. Sexual colouration and sperm traits in guppies. *Journal of Fish*  
711 *Biology* 70:165-177.
- 712 Pryke SR, Astheimer LB, Buttemer WA, Griffith SC, 2007. Frequency-dependent physiological trade-  
713 offs between competing colour morphs. *Biol Lett* 3:494-497. doi: 10.1098/rsbl.2007.0213.
- 714 Pryke SR, Griffith SC, 2006. Red dominates black: agonistic signalling among head morphs in the  
715 colour polymorphic Gouldian finch. *Proc R Soc B* 273:949-957. doi: 10.1098/rspb.2005.3362.
- 716 Quintero-Moreno A, Miró J, Teresa Rigau A, Rodríguez-Gil JE, 2003. Identification of sperm  
717 subpopulations with specific motility characteristics in stallion ejaculates. *Theriogenology*  
718 59:1973-1990. doi: [http://dx.doi.org/10.1016/S0093-691X\(02\)01297-9](http://dx.doi.org/10.1016/S0093-691X(02)01297-9).
- 719 Rakitin A, Ferguson MM, Trippel EA, 1999. Sperm competition and fertilization success in Atlantic cod  
720 (*Gadus morhua*): effect of sire size and condition factor on gamete quality. *Can J Fish Aquat*  
721 *Sci* 56:2315-2323.
- 722 Ramm SA, Schärer L, 2014. The evolutionary ecology of testicular function: Size isn't everything. *Biol*  
723 *Rev* 89:874-888.
- 724 Ribou A-C, Reinhardt K, 2012. Reduced metabolic rate and oxygen radicals production in stored insect  
725 sperm. *Proc R Soc B* 279:2196-2203. doi: 10.1098/rspb.2011.2422.
- 726 Rickard JP, Pini T, Soleilhavoup C, Cognie J, Bathgate R, Lynch GW, Evans G, Maxwell W, Druart X, De  
727 Graaf S, 2014. Seminal plasma aids the survival and cervical transit of epididymal ram  
728 spermatozoa. *Reproduction* 148:469-478.
- 729 Rojas Mora A, Firth A, Blareau S, Vallat A, Helfenstein F, 2017a. Oxidative stress affects sperm  
730 performance and ejaculate redox status in subordinate House Sparrows. *J Exp Biol:jeb*.  
731 154799.
- 732 Rojas Mora A, Meniri M, Glauser G, Vallat A, Helfenstein F, 2016. Badge size reflects sperm oxidative  
733 status within social groups in the House Sparrow *Passer domesticus*. *Frontiers in Ecology and*  
734 *Evolution* 4:67.
- 735 Rojas Mora A, Meniri M, Gning O, Glauser G, Vallat A, Helfenstein F, 2017b. Antioxidant allocation  
736 modulates sperm quality across changing social environments. *PLoS ONE* 12:e0176385.

- 737 Rollings N, Friesen CR, Sudyka J, Whittington C, Giraudeau M, Wilson M, Olsson M, 2017. Telomere  
738 dynamics in a lizard with morph-specific reproductive investment and self-maintenance. *Ecol*  
739 *Evo* 7:5163-5169. doi: 10.1002/ece3.2712.
- 740 Rowe M, Swaddle JP, Pruett-Jones S, Webster MS, 2010. Plumage coloration, ejaculate quality and  
741 reproductive phenotype in the red-backed fairy-wren. *Anim Behav* 79:1239-1246. doi:  
742 10.1016/j.anbehav.2010.02.020.
- 743 Ruiz-Pesini E, Lapeña A-C, Díez-Sánchez C, Pérez-Martos A, Montoya J, Alvarez E, Díaz M, Urriés A,  
744 Montoro L, López-Pérez MJ, 2000. Human mtDNA haplogroups associated with high or  
745 reduced spermatozoa motility. *The American Journal of Human Genetics* 67:682-696.
- 746 Sanocka D, Kurpisz M, 2004. Reactive oxygen species and sperm cells. *Reproductive Biology and*  
747 *Endocrinology* 2:1-7.
- 748 Sayegh JF, Lajtha A, 1989. In vivo rates of protein synthesis in brain, muscle, and liver of five  
749 vertebrate species. *Neurochem Res* 14:1165-1168. doi: 10.1007/bf00965625.
- 750 Simmons LW, Emlen DJ, 2006. Evolutionary trade-off between weapons and testes. *Proc Natl Acad Sci*  
751 *USA* 103:16346-16351.
- 752 Simmons LW, Firman RC, Rhodes G, Peters M, 2004. Human sperm competition: testis size, sperm  
753 production and rates of extrapair copulations. *Anim Behav* 68:297-302.
- 754 Simmons LW, Fitzpatrick JL, 2012. Sperm wars and the evolution of male fertility. *Reproduction*  
755 144:519-534. doi: 10.1530/rep-12-0285.
- 756 Simon L, Lewis SEM, 2011. Sperm DNA damage or progressive motility: which one is the better  
757 predictor of fertilization in vitro? *Systems Biology in Reproductive Medicine* 57:133-138. doi:  
758 10.3109/19396368.2011.553984.
- 759 Sinervo B, Lively CM, 1996. The rock-paper-scissors game and the evolution of alternative male  
760 strategies. *Nature* 380:240-243. doi: 10.1038/380240a0.
- 761 Svensson PA, Wong B, 2011. Carotenoid-based signals in behavioural ecology: A review. *Behaviour*  
762 148:131-189.
- 763 Tazzyman SJ, Pizzari T, Seymour RM, Pomiankowski A, 2009. The evolution of continuous variation in  
764 ejaculate expenditure strategy. *Am Nat* 174:E71-E82.
- 765 Tourmente M, Gomendio M, Roldan ER, 2011. Mass-specific metabolic rate and sperm competition  
766 determine sperm size in marsupial mammals. *PLoS ONE* 6:e21244.
- 767 Toyama Brandon H, Savas Jeffrey N, Park Sung K, Harris Michael S, Ingolia Nicholas T, Yates John R,  
768 Hetzer Martin W, 2013. Identification of long-lived proteins reveals exceptional stability of  
769 essential cellular structures. *Cell* 154:971-982. doi:  
770 <http://dx.doi.org/10.1016/j.cell.2013.07.037>.
- 771 Tranah GJ, Manini TM, Lohman KK, Nalls MA, Kritchevsky S, Newman AB, Harris TB, Miljkovic I, Biffi A,  
772 Cummings SR, 2011. Mitochondrial DNA variation in human metabolic rate and energy  
773 expenditure. *Mitochondrion* 11:855-861.
- 774 Tremellen K, 2008. Oxidative stress and male infertility--a clinical perspective. *Human Reproduction*  
775 *Update* 14:243.
- 776 Tuni C, Han CS, Dingemans NJ, 2018. Multiple biological mechanisms result in correlations between  
777 pre-and post-mating traits that differ among versus within individuals and genotypes. *Proc R*  
778 *Soc B* 285:20180951.
- 779 Turrens JF, 2003. Mitochondrial formation of reactive oxygen species. *The Journal of Physiology*  
780 552:335-344.
- 781 Valentine JS, Doucette PA, Zittin Potter S, 2005. Copper-zinc superoxide dismutase and amyotrophic  
782 lateral sclerosis. *Annu Rev Biochem* 74:563-593.
- 783 van der Horst G, Maree L, 2014. Sperm form and function in the absence of sperm competition. *Mol*  
784 *Reprod Dev* 81:204-216.
- 785 Vander Zanden MJ, Clayton MK, Moody EK, Solomon CT, Weidel BC, 2015. Stable isotope turnover  
786 and half-life in animal tissues: A literature synthesis. *PLoS ONE* 10:e0116182.

- 787 von Schantz T, Bensch S, Grahn M, Hasselquist D, Wittzell H, 1999. Good genes, oxidative stress and  
788 condition-dependent sexual signals. *Proc R Soc B* 266:1-12.
- 789 Warne RW, Gilman CA, Wolf BO, 2010. Tissue-carbon incorporation rates in lizards: implications for  
790 ecological studies using stable isotopes in terrestrial ectotherms. *Physiol Biochem Zool*  
791 83:608-617.
- 792 Wellenreuther M, Svensson EI, Hansson B, 2014. Sexual selection and genetic colour polymorphisms  
793 in animals. *Mol Ecol* 23:5398-5414.
- 794 Withers P, 1992. *Comparative Animal Physiology*. Philadelphia: Saunders College Publishing.
- 795
- 796

797 **Figure legends**

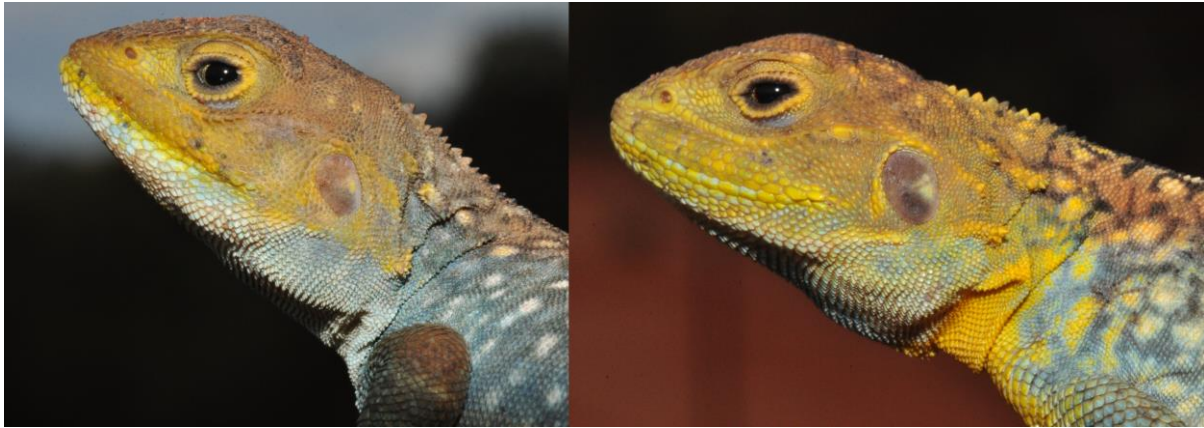

798

799 **Figure 1**

800 Male painted dragon lizards. On the left is a male without a yellow throat patch (i.e. a non-bibbed  
801 male) and on the right is a male with a yellow throat patch (i.e. a bibbed male).

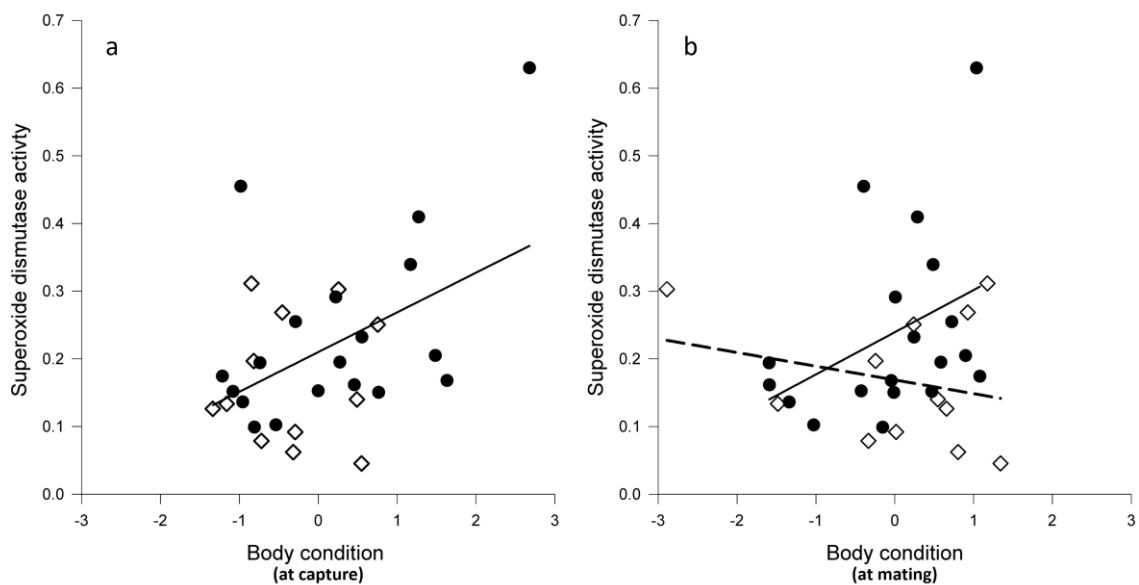

802

803 **Figure 2**

804 Relationship between SOD activity (untransformed data graphed) and body condition (BCI, residual  
805  $\ln(\text{body mass})$  given  $\ln(\text{snout to vent length})$ ). In each graph, solid circles ( $\bullet$ ) represent non-bibbed  
806 males and unfilled diamonds ( $\diamond$ ) represent bibbed males. Panel **a**) SOD activity at mating as a  
807 function of body condition *at capture*:  $R^2 = 0.213$ ,  $P = 0.009$ . Panel **b**) SOD activity at mating as a  
808 function of body condition at mating: separate regression lines for each morph are plotted due to  
809 the significant morph  $\times$  BCI interaction ( $P = 0.015$ ; solid line represents non-bibbed males ( $R^2 = 0.149$ ,  
810  $P = 0.103$ ), dashed line represents bibbed males ( $R^2 = 0.066$ ,  $P = 0.420$ ).

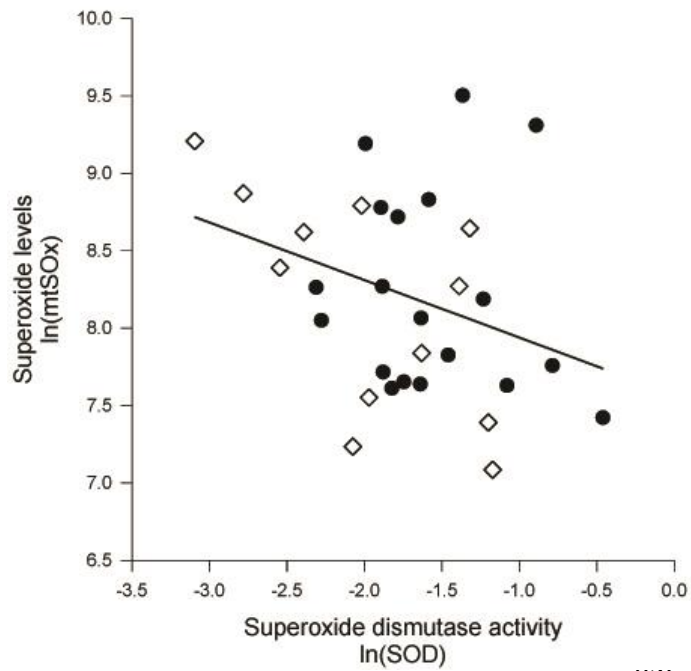

826

827 **Figure 3**

828 Negative relationship between mitochondrial superoxide levels in blood cells and plasma superoxide  
829 dismutase activity ( $R^2 = 0.107$ ,  $P = 0.018$ ). Solid circles (●) represent non-bibbed males and unfilled  
830 diamonds (◇) represent bibbed males.

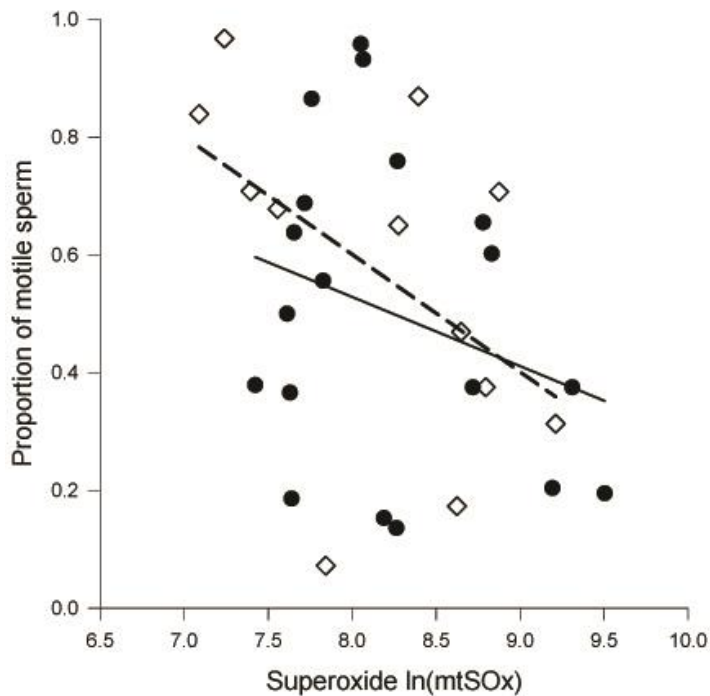

831

832 **Figure 4**

833 Overall negative relationship between sperm motility and mitochondrial superoxide levels ( $P =$   
834  $0.001$ ). We have graphed separate regressions for each bib-morph: Solid circles (●) represent non-  
835 bibbed males (solid regression line,  $R^2 = 0.080$ ) and unfilled diamonds (◇) represent bibbed males  
836 (dashed regression line,  $R^2 = 0.249$ ).

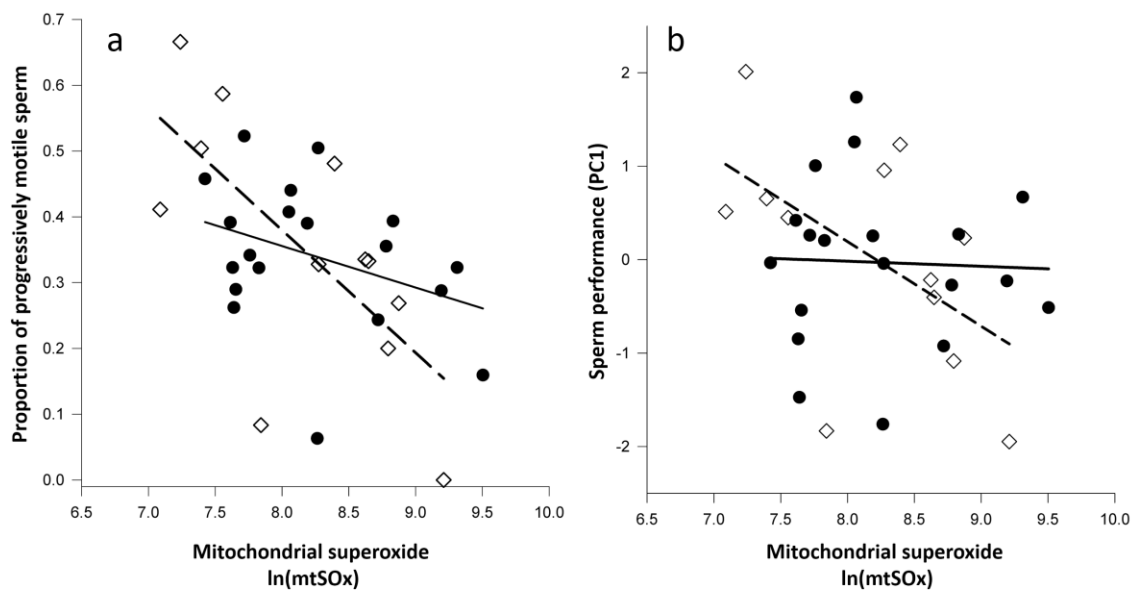

837

838 **Figure 5**

- 839 a) Negative relationship between the proportion of progressively motile sperm (PMOT) and  
840 mitochondrial superoxide levels in blood cells ( $\ln(\text{mtSOx})$ ;  $P < 0.001$ ). Regression lines were  
841 calculated and plotted separately for each morph given the significant  $\text{bib} \times \ln(\text{mtSOx})$  level  
842 interaction ( $P = 0.036$ ). Solid circles ( $\bullet$ ) represent non-bibbed males (solid regression line:  $R^2$   
843  $= 0.130$ ) and unfilled diamonds ( $\diamond$ ) represent bibbed males (dashed regression line:  $R^2 =$   
844  $0.458$ ).
- 845 b) Negative relationship between sperm performance (PC1) and mitochondrial superoxide  
846 levels ( $\ln(\text{mtSOx})$ ,  $P = 0.019$ ). PC1 is positively correlated with the following sperm kinematic  
847 parameters: LIN, ALH, MOT, PMOT, VCL, VAP, VSL see text for definitions ( $r$  ranged 0.663-  
848 0.994, all  $p < 0.0001$ ); BCF (beat frequency) had a significantly negative correlation with PC1  
849 ( $r = -0.578$ ,  $P < 0.0001$ ). Regression lines were calculated and plotted separately for each  
850 morph given the significant  $\text{bib} \times \ln(\text{mtSOx})$  level interaction ( $P = 0.038$ ). Solid circles ( $\bullet$ )  
851 represent non-bibbed males (solid regression line:  $R^2 = 0.002$ ) and unfilled diamonds ( $\diamond$ )  
852 represent bibbed males (dashed regression line:  $R^2 = 0.288$ ).

853  
854  
855  
856  
857  
858  
859  
860

## 861 Tables

862 **Table 1:** Model effects of GLM (normal, identity link function) SOD activity as a function of bib and  
863 BCI at the time of mating. Full model:  $\ln(\text{SOD}) \sim \text{Bib} + \text{BCI}_{\text{mating}} + \text{Bib} * \text{BCI}$ . Likelihood ratio  $\chi^2_{df3} =$   
864 8.9166,  $P = 0.043$  vs intercept only model. Bib = 1 (n = 12), Non-bibbed = 0 (n = 19), thus a positive  
865 coefficient indicates non-bibbed is greater than bibbed. Bold text indicates  $P \leq 0.05$ .

| ln(SOD)~<br>Source                      | $\beta(\text{se})$ | 95% Likelihood CI<br>(lower, upper) | Type III Sum of Squares |                  |
|-----------------------------------------|--------------------|-------------------------------------|-------------------------|------------------|
|                                         |                    |                                     | Wald                    | Sig.             |
| Intercept                               | -1.951(0.165)      | -2.243, -1.658                      | 328.891                 | <b>&lt;0.001</b> |
| Bib (0 vs 1)                            | 0.394(0.194)       | 0.021, 0.768                        | 4.161                   | <b>0.041</b>     |
| BCI <sub>mating</sub>                   | -0.161(0.129)      | -0.413, 0.90                        | 1.570                   | 0.210            |
| Bib x BCI <sub>mating</sub><br>(0 vs 1) | 0.407(0.168)       | 0.028, 0.786                        | 5.878                   | <b>0.015</b>     |

866

867 **Table 2:** Model effects of GLM (normal distribution, identity link function) mtSOx levels as a function  
868 of bib and SOD activity at the time of mating. Full model:  $\ln(\text{mtSOx}) \sim \text{Bib} + \ln(\text{SOD}) + \text{Bib} * \ln(\text{SOD})$ :  
869 Likelihood ratio  $\chi^2_{df3} = 6.345$ ,  $P = 0.096$  vs intercept only model. Reduced model:  $\text{mtSOx} \sim \ln(\text{SOD})$   
870 Likelihood ratio  $\chi^2_{df1} = 4.646$ ,  $P = 0.031$ . Bib = 1 (n = 12), Non-bibbed = 0 (n = 19), thus a positive  
871 coefficient indicates non-bibbed greater than bibbed. Bold text indicates  $P \leq 0.05$ .

| ln(mtSOx)~<br>Source      | $\beta(\text{se})$ | 95% Likelihood CI<br>(lower, upper) | Type III Sum of Squares |                  |
|---------------------------|--------------------|-------------------------------------|-------------------------|------------------|
|                           |                    |                                     | Wald                    | Sig.             |
| Intercept                 | 6.786(0.470)       | 5.646, 7.926                        | 445.140                 | <b>&lt;0.001</b> |
| Bib (0 vs 1)              | 1.174(0.699)       | 0.294, 2.642                        | 2.820                   | 0.093            |
| ln(SOD)                   | -0.701(0.194)      | -1.256, -0.147                      | 6.297                   | <b>0.012</b>     |
| Bib x ln(SOD)<br>(0 vs 1) | 0.527(0.349)       | -0.265, 1.318                       | 2.276                   | 0.131            |

872

873 **Table 3a:** Model effects of GLM (normal distribution, identity link function) sperm motility (MOT) as  
874 a function of bib and mtSOx level at the time of mating. Full model:  $\text{MOT} \sim \text{mtSOx} + \text{bib} +$   
875  $\text{bib} * \text{mtSOx}$ : Likelihood ratio  $\chi^2_{df3} = 5.486$ ,  $P = 0.139$  vs intercept only model. Reduced model:  $\text{MOT} \sim$   
876  $\text{mtSOx}$  Likelihood ratio  $\chi^2_{df1} = 4.747$ ,  $P = 0.029$ . Bib = 1 (n = 12), Non-bibbed = 0 (n = 19), thus a  
877 positive coefficient indicates non-bibbed greater than bibbed. Bold text indicates  $P \leq 0.05$ .

| MOT~<br>Source | $\beta(\text{se})$ | 95% Likelihood CI<br>(lower, upper) | Type III Sum of Squares |                  |
|----------------|--------------------|-------------------------------------|-------------------------|------------------|
|                |                    |                                     | Wald                    | Sig.             |
| Intercept      | 220.008(56.382)    | 48.628, 391.39                      | 21.279                  | <b>&lt;0.001</b> |
| Bib (0 vs 1)   | -73.048(79.553)    | -300.85, 154.754                    | 0.843                   | 0.358            |
| mtSOx          | -19.993(6.822)     | -40.919, -0932                      | 11.244                  | <b>0.001</b>     |
| Bib x mtSOx    | -8.231(9.470)      | -19.485, 35.948                     | 0.755                   | 0.385            |

|          |  |  |  |  |
|----------|--|--|--|--|
| (0 vs 1) |  |  |  |  |
|----------|--|--|--|--|

878

879

880

881 **Table 3:** Model effects of GLM (normal distribution, identity link function) “sperm performance”  
 882 (PC1) as a function of bib and mtSOx level at the time of mating. Full model:  $PC1 \sim mtSOx + bib +$   
 883  $bib * mtSOx$ : Likelihood ratio  $\chi^2_{df3} = 8.638$ ,  $P = 0.035$  vs intercept only model. Bib = 1 (n = 12), Non-  
 884 bibbed = 0 (n = 19), thus a positive coefficient indicates non-bibbed greater than bibbed. Bold text  
 885 indicates  $P \leq 0.05$ .

| Sperm performance (PC1) Source | $\beta$ (se)   | 95% Likelihood CI (lower, upper) | Type III Sum of Squares |              |
|--------------------------------|----------------|----------------------------------|-------------------------|--------------|
|                                |                |                                  | Wald                    | Sig.         |
| Intercept                      | 20.145(7.202)  | 6.561, 33.729                    | 6.846                   | <b>0.009</b> |
| Bib (0 vs 1)                   | -17.744(8.617) | -35.799, -0.312                  | 4.240                   | <b>0.039</b> |
| mtSOx                          | -2.456(0.863)  | -4.115, -0.798                   | 7.178                   | <b>0.007</b> |
| Bib x mtSOx (0 vs 1)           | 2.157(01.029)  | 0.040, 4.354                     | 4.398                   | <b>0.036</b> |

886
